# Supplementary material for: Thermally Stable and Antimicrobial Active Poly(Catechin) Obtained by Reaction with a Cross-Linking Agent
Source: PubMed Central journal article supplement (PMC7823284; doi:10.3390/biom11010050), 2020-12-31
Supplement: biomolecules-11-00050-s001.pdf [file biomolecules-11-00050-s001.pdf]

*Supplementary Materials*

# **Thermally stable and antimicrobial active poly(catechin) obtained by reaction with a cross-linking agent**

**Malgorzata Latos-Brozio <sup>1</sup>, Anna Masek <sup>1,\*</sup> and Malgorzata Piotrowska <sup>2</sup>**

<sup>1</sup> Faculty of Chemistry, Institute of Polymer and Dye Technology, Lodz University of Technology, Stefanowskiego 12/16, 90-924 Lodz, Poland; malgorzata.latos@p.lodz.pl

<sup>2</sup> Faculty of Biotechnology and Food Sciences, Institute of Fermentation Technology and Microbiology Lodz University of Technology, Wólczańska 71/173, 90-924 Lodz, Poland; malgorzata.piotrowska@p.lodz.pl

\* Correspondence: anna.masek@p.lodz.pl (A.M.)

**Figure S1.**  $^1\text{H}$  NMR spectra of poly(catechin) in deuterated water and in DMSO.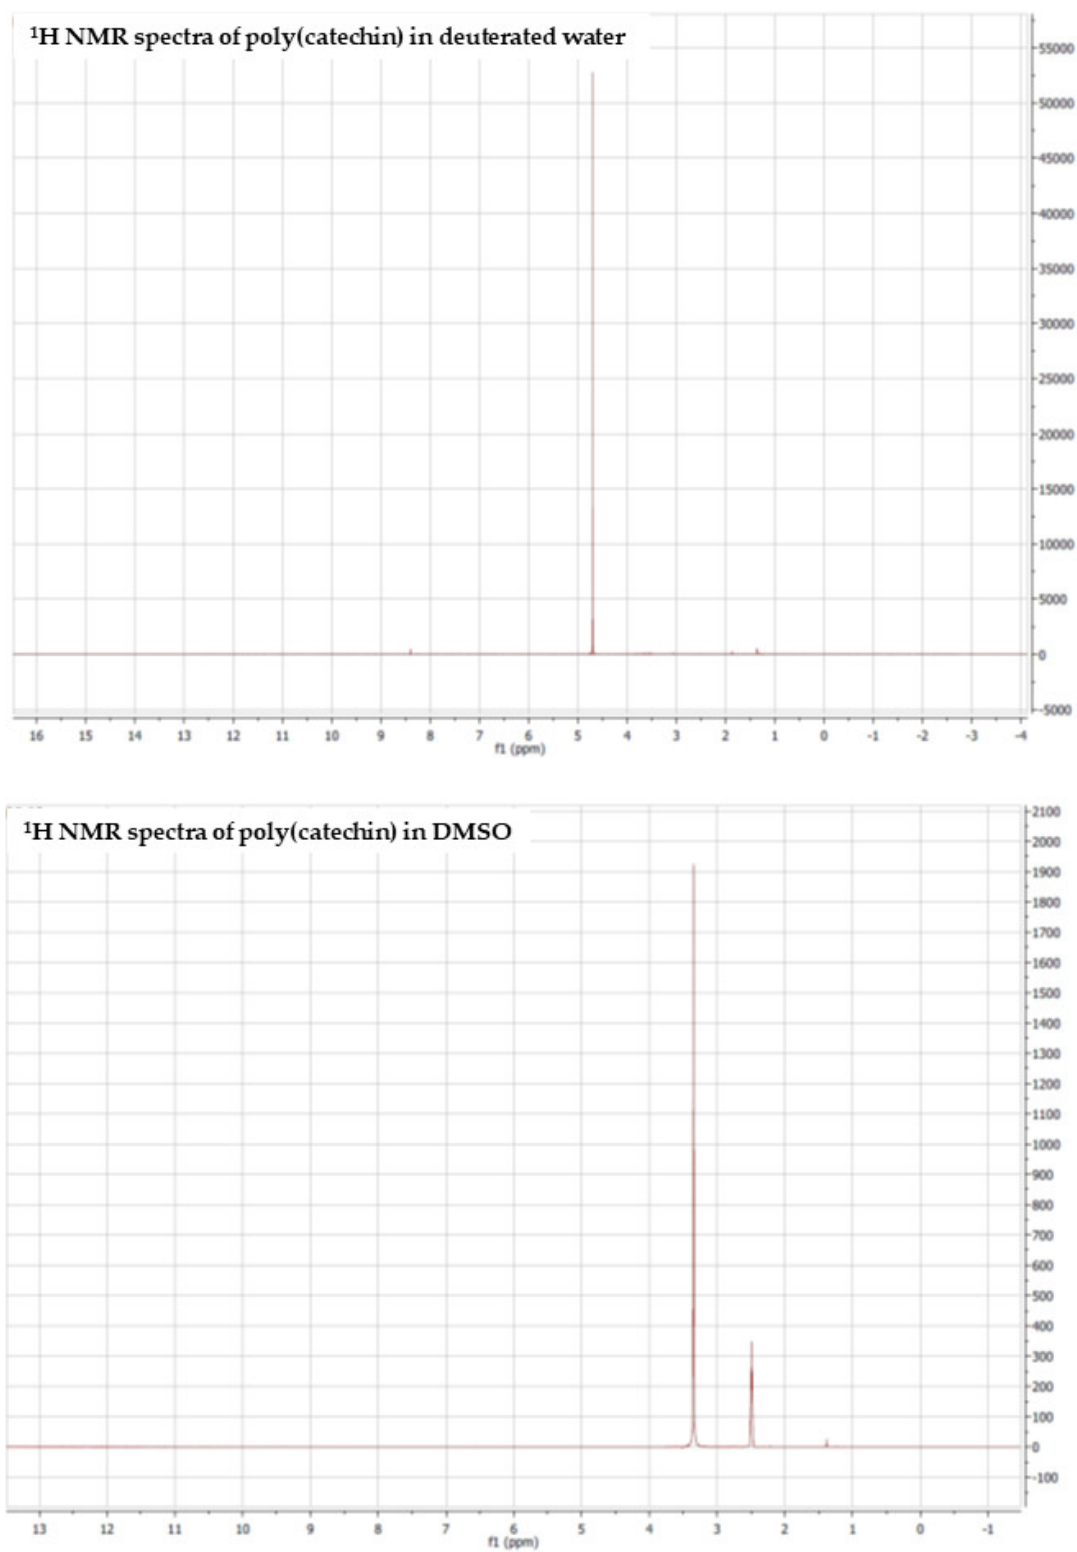**Figure S1.**  $^1\text{H}$  NMR spectra of poly(catechin) in deuterated water and in DMSO.
